# Supplementary material
Source: PubMed Central journal article supplement (PMC5198491)
Supplement: JB.00662-16_zjb999094293s1.pdf [file JB.00662-16_zjb999094293s1.pdf]

## Supplemental Material

Table S1. Comparison and quality data of structures for MrpA domain models.

| Domain | Ramachandran plot quality (%) |         |         |            |
|--------|-------------------------------|---------|---------|------------|
|        | Core                          | Allowed | General | Disallowed |
| MrpA_N | 91.6                          | 6.9     | 1.5     | 0.0        |
| MrpA_C | 93.0                          | 5.7     | 1.7     | 0.0        |

Ramachandran plot qualities shows percentage (%) of residues belonging to the core, allowed, generally allowed and disallowed region of the plot.

Figure S1. Agarose gel electrophoresis of restriction-digested plasmids isolated from Na<sup>+</sup>/H<sup>+</sup> antiporter-deficient *E. coli* strains transformed with pET21a containing the *mrpA* insert. Colony 9 (EP432) and colony 13 (KNabc) were used for further experiments.

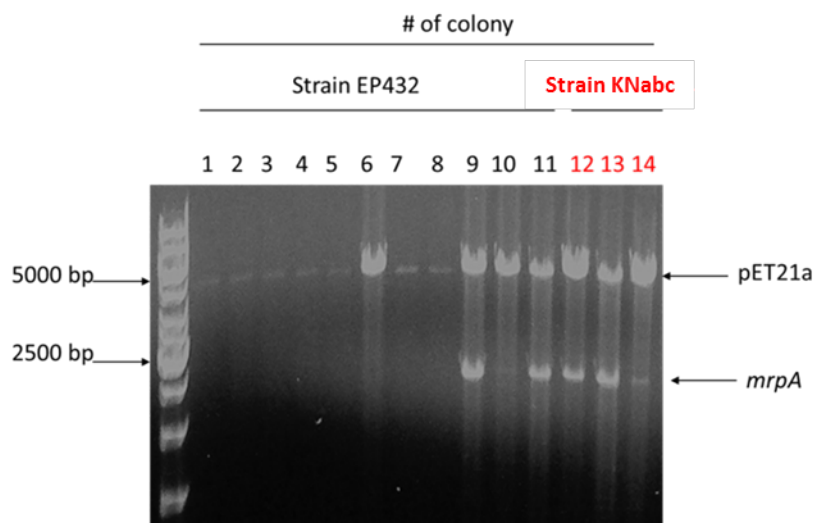

Figure S2. Ramachandran plot for the MrpA\_N domain.

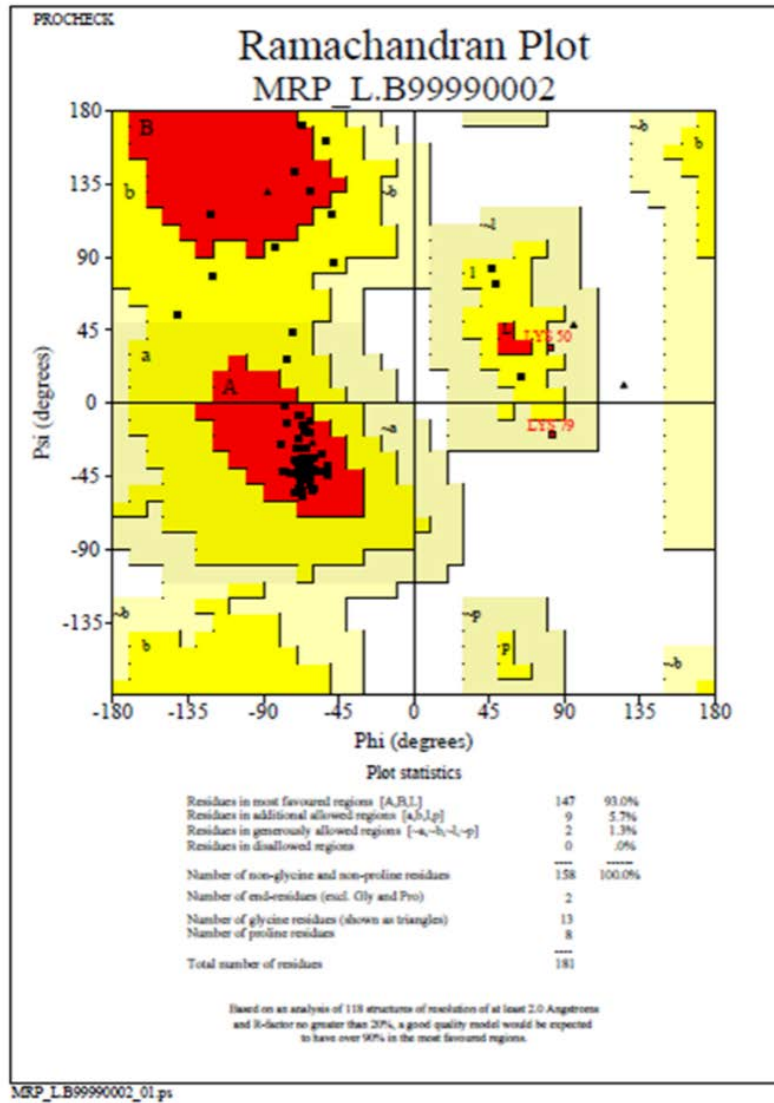

Figure S3. Ramachandran plot for the MrpA\_C domain.

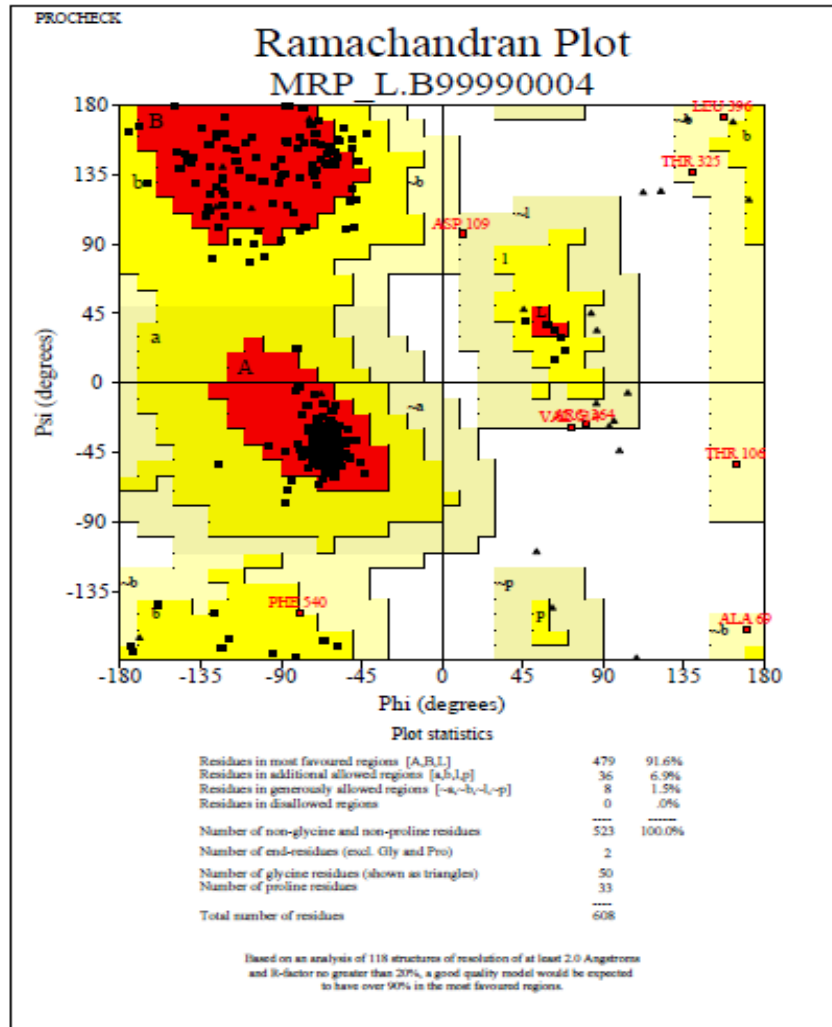

Figure S4. Multiple sequence alignment of *M. acetivorans* MrpA with MrpA-related proteins. (A) *M. acetivorans* MrpA N-terminal domain alignment. The domain is composed by 16 transmembrane (TM) helices. The C-terminus of the N-terminal domain contains the piston-like structure, which is shorter in MrpA than in NuoL of *E. coli*. (B) *M. acetivorans* MrpA C-terminal domain alignment. The domain is formed by five transmembrane (TM) segments. The predicted secondary structure of *M. acetivorans* MrpA is shown on the sequence alignment. Positions with overall identity greater than 80% are shaded in black, while sites with overall similarity greater than 80% are shaded in grey. Highly conserved charged residues proposed to be involved in MrpA function are marked with a red asterisk. The  $\beta$ H motifs are shown in yellow. The alignment was performed with T-Coffee (1). The sequence access numbers are: *Methanosarcina acetivorans* (WP\_048174247.1), *Methanococcoides burtonii* (WP\_011498313), *Bacillus subtilis* BSn5 (ADV93965), *Escherichia coli* K12 NuoL (P33607) and *Natranaerobius thermophilus* (WP\_012446597).

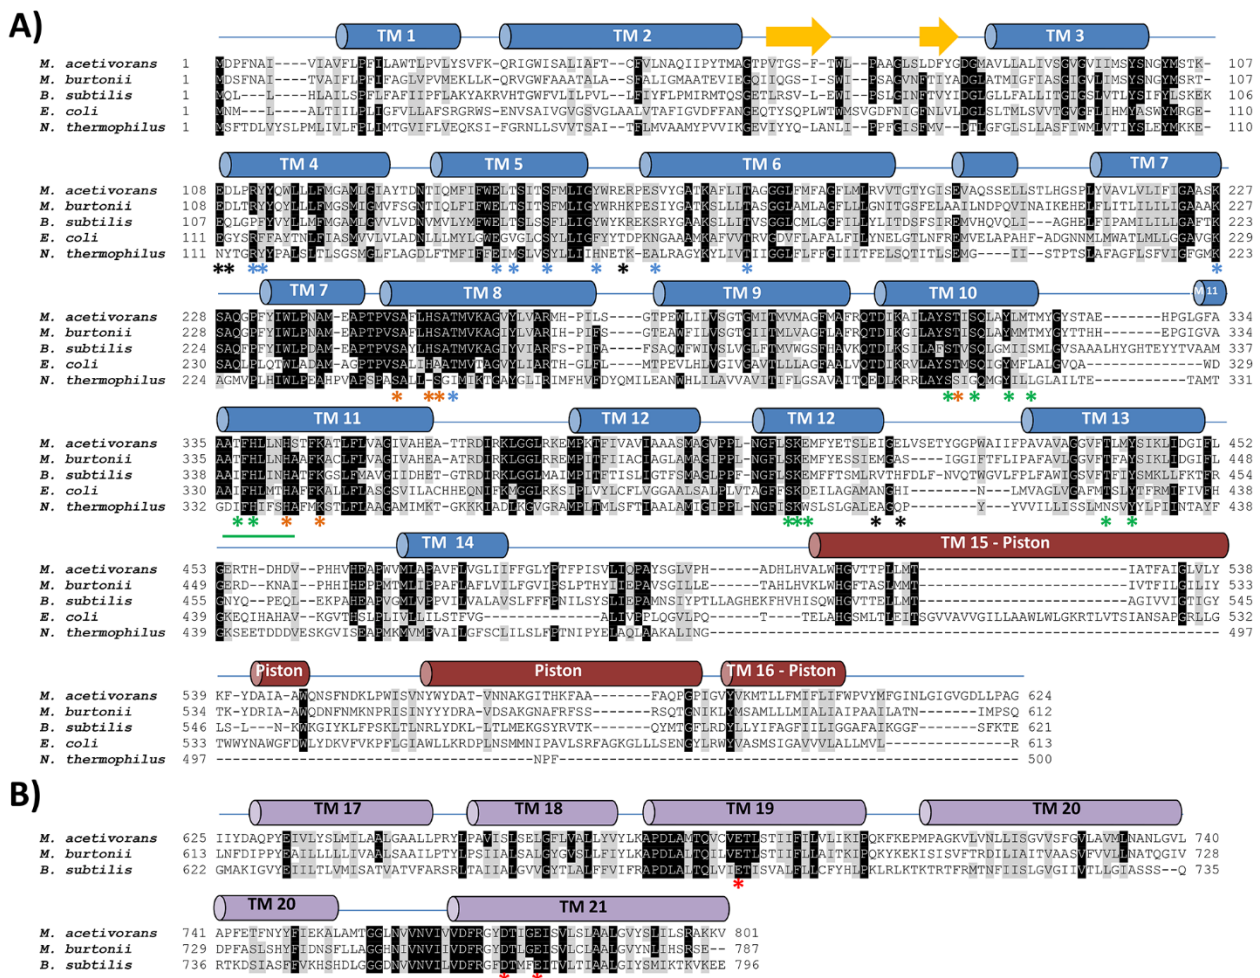

Figure S5. Alignment of amino acid sequences in clades I, II listed in Figure 4. The organism names and associated IDs are listed in the caption to Figure 4. The MrpA sequence from *M. acetivorans* (WP011024445) is bolded and underlined. Sequences were aligned with COBALT.

|                            |                 |                                                                                                                                                                                                                                             |     |
|----------------------------|-----------------|---------------------------------------------------------------------------------------------------------------------------------------------------------------------------------------------------------------------------------------------|-----|
| <b><u>WP_011024445</u></b> | <b><u>1</u></b> | MDPFNAIIVIAVFLPFI <del>LA</del> WTLPLVLYSVFKQRI <del>GWISALIA</del> FTCFVLNAQII <del>IPY</del> TMA-GTPVTVGSFTWLPAAGLSLDFYGD                                                                                                                 | 79  |
| WP_048174247               | 1               | MDPFNAIIVIAVFLPFI <del>LA</del> WTLPLVLYSVFKQRI <del>GWISALIA</del> FTCFVLNAQVI <del>IPY</del> TMA-GTPVTVGSFTWLPAAGLSLDFYGD                                                                                                                 | 79  |
| WP_048136646               | 1               | MDPFNAIIVIAVFLPFI <del>LA</del> WTLPLVLYSVFKQRI <del>GWISALIA</del> FTCFVLNAQVI <del>IPY</del> TMA-GTPVTVGSFTWLPAAGLSLDFYGD                                                                                                                 | 79  |
| WP_048125080               | 1               | MDPFNAIIVIAVFLPFI <del>LA</del> WTLPLVLYSVFKQRI <del>GWISALIA</del> FTCFALNTQVI <del>IPY</del> AMA-GTPVTVGSFTWLPAAGLSLDFYGD                                                                                                                 | 79  |
| WP_048124368               | 1               | MDPFNAILIAVFLPFI <del>LA</del> WTLPLVLYKVKQRI <del>GWISALIA</del> FAFVFNQVI <del>IPY</del> AMA-GTPVTVGSFTWLPAAGLSLDFYGD                                                                                                                     | 79  |
| WP_023846288               | 1               | MDSFTAITIAVFLPFI <del>LA</del> WTLPAVEKLLK <del>KEKVGWYASATALLS</del> LLLIAQVAP <del>EIIH</del> -GETIQGTIEWLPSMGVNL <del>SFY</del> AD                                                                                                       | 79  |
| WP_013194388               | 1               | MNSFTVIALAIFL <del>PFL</del> SAATVPLAQKIL <del>RHRVGFASAMAFVS</del> FLLIAYVAP <del>VVIH</del> -GDTFTGAVS <del>WLP</del> SVGV <del>EFSV</del> YID                                                                                            | 79  |
| WP_048204897               | 1               | MDSFNAITVAIFL <del>PFI</del> FAGLVPVMEKLL <del>QRVGFYAAATALT</del> SFILIGMAAPEVLEEGHIV <del>QGTISWIP</del> SAGVNF <del>SIY</del> AD                                                                                                         | 80  |
| WP_013037209               | 1               | MDSFTAILAIFL <del>PFAA</del> FIPLLEKFL <del>KHRIGWFAAGIA</del> FLS <del>FALIGIV</del> AP <del>EIIH</del> -GHIIQHSIEW <del>MP</del> SIGAE <del>FSIY</del> AD                                                                                 | 79  |
| WP_015325011               | 1               | MDFPILITLAVFL <del>PFL</del> LAVAVPAVEKLL <del>KHRVGFATL</del> VAFIS <del>FLLVISIS</del> PLVMH-GENFQASV <del>EWLPS</del> MGV <del>EYSIY</del> VD                                                                                            | 79  |
| WP_048147233               | 1               | MDLFTAITLAVFL <del>PFI</del> IMAGILPAEKLV <del>LKRI</del> GWYAAAT <del>ALMS</del> LLLVAQAV <del>PVSVN</del> -GENIQGSV <del>PWLP</del> SLG <del>IELS</del> FYGD                                                                              | 79  |
| WP_011498313               | 1               | MDSFNAITVAIFL <del>PFI</del> FAGLVPVMEKLL <del>QRVGFYAAATALT</del> SEI <del>ALV</del> IGMAAPEVIE-QQIIQGSIS <del>WIP</del> SAGVNF <del>TIY</del> AD                                                                                          | 79  |
| WP_013898326               | 1               | MDQSVAILAIFL <del>PFI</del> FALLV <del>PVEK</del> IK <del>HRIGWYAS</del> F <del>TAL</del> TL <del>FLI</del> IATAAP <del>TI</del> IA-GKTVQYSV <del>KWLP</del> SVGV <del>DFGIY</del> VD                                                       | 79  |
| WP_011024445               | 80              | GMAVLLALIVSGVGIIMS <del>YSNGYM</del> STKEDL <del>PRYYQWLL</del> LFMGAM <del>LGI</del> AYTDNTIQ <del>MFIFWEL</del> TSITS <del>FMLIGY</del> WRERPE                                                                                            | 159 |
| WP_048174247               | 80              | GMAVLLALIVSGVGIIMS <del>YSNGYM</del> STKEDL <del>PRYYQWLL</del> LFMGAM <del>LGI</del> AYTDNTIQ <del>MFIFWEL</del> TSITS <del>FMLIGY</del> WRERPE                                                                                            | 159 |
| WP_048136646               | 80              | GMAVLLALIVSGVGIIMS <del>YSNGYM</del> STKEDL <del>PRYYQWLL</del> LFMGAM <del>LGI</del> AYTDNTIQ <del>MFIFWEL</del> TSITS <del>FMLIGY</del> WRERPE                                                                                            | 159 |
| WP_048125080               | 80              | GMAVLLALIVSGVGIIMS <del>YSNGYM</del> STKEDL <del>PRYYQWLL</del> LFMGAM <del>LGI</del> AYTDNTIQ <del>MFIFWEL</del> TSITS <del>FMLIGY</del> WRERPE                                                                                            | 159 |
| WP_048124368               | 80              | GMAVLLALIVSGVGIIMS <del>AYSNGYM</del> STKEDL <del>PRYYQWLL</del> LFMGAM <del>LGI</del> AYTDNTIQ <del>MFIFWEL</del> TSITS <del>FMLIGY</del> WRERPE                                                                                           | 159 |
| WP_023846288               | 80              | GLSV <del>MGFIV</del> SGIGVIMS <del>YSNGYMSK</del> EDL <del>PRYYQWLL</del> FMGSM <del>LGMVFS</del> ANTI <del>QLFIFWEL</del> TSITS <del>FMLIGY</del> WRNRPM                                                                                  | 159 |
| WP_013194388               | 80              | GLSLLIGL <del>IASG</del> IGIIMS <del>YSNGYMSK</del> EDL <del>SRYYQLL</del> LFMGSM <del>LGMVFS</del> ANTI <del>QLFIFWEL</del> TSITS <del>FLLIGF</del> WRHRPL                                                                                 | 159 |
| WP_048204897               | 81              | GLAMLIG <del>FIASG</del> IGVIMS <del>YSNGYMSK</del> EDL <del>KRYQYLL</del> FMGSM <del>LGMVFS</del> ANTI <del>QLFIFWEL</del> TSITS <del>FMLIGY</del> WRHKPE                                                                                  | 160 |
| WP_013037209               | 80              | GLAMMIG <del>FIASG</del> IGVIMS <del>YSNGYMSK</del> EDL <del>PRYYQYLL</del> FMGSM <del>LGMVFA</del> GN <del>TQLFIFWEL</del> TSITS <del>FMLIGY</del> WRGPKA                                                                                  | 159 |
| WP_015325011               | 80              | GLSVLFG <del>IIITG</del> IGIIMS <del>FYSNGYMGH</del> EDL <del>PRYYQWLL</del> FMGSM <del>LGMVFA</del> ANT <del>IML</del> FV <del>WEL</del> TSITS <del>FMLIGY</del> WRNRPM                                                                    | 159 |
| WP_048147233               | 80              | GLS <del>IMFGLIV</del> SGVGIIMS <del>YSNGYMSK</del> EDL <del>SRYYQLL</del> FMGSM <del>LGMVFS</del> SN <del>IQLFIFWEL</del> TSITS <del>FMLIGY</del> WRNRPM                                                                                   | 159 |
| WP_011498313               | 80              | GLATMIG <del>FIASG</del> IGVIMS <del>YSNGYMSR</del> TEDL <del>TRYYQYLL</del> FMGSM <del>LGMVFS</del> GN <del>TQLFIFWEL</del> TSITS <del>FMLIGY</del> WRHKPE                                                                                 | 159 |
| WP_013898326               | 80              | GLSLLIA <del>FLASG</del> IATIM <del>AYSNE</del> YMS <del>HKED</del> LAAY <del>YKILL</del> FMGSM <del>LGMVFS</del> ANTI <del>QLFIFWEL</del> TSITS <del>FLLIGY</del> WKHKPQ                                                                   | 159 |
| WP_011024445               | 160             | SVYGATKAF <del>LITAG</del> -GGLFMFAG <del>FMLR</del> VVTGT <del>YIGISEVAQ</del> SSELL <del>STLHG</del> SPLYVAVL <del>LVIFIGA</del> ASKSAQ <del>GPFI</del> WLP                                                                               | 238 |
| WP_048174247               | 160             | SVYGATKAF <del>LITAG</del> -GGLFMFAG <del>FMLR</del> VVTGT <del>YIGISEVAQ</del> SSELL <del>STLHG</del> SPLYVAVL <del>LVIFIGA</del> ASKSAQ <del>GPFI</del> WLP                                                                               | 238 |
| WP_048136646               | 160             | SVYGATKAF <del>LITAG</del> -GGLFMFAG <del>FMLR</del> VVTGT <del>YIGISEVAQ</del> SSELL <del>STLHG</del> SPLYVAVL <del>LVIFIGA</del> ASKSAQ <del>GPFI</del> WLP                                                                               | 238 |
| WP_048125080               | 160             | SVYGATKAF <del>LITAG</del> -GGLFMFAG <del>FMLR</del> VVTGT <del>YIGISEVAQ</del> SSELL <del>STLHG</del> SPLYVAVL <del>LVIFIGA</del> ASKSAQ <del>GPFI</del> WLP                                                                               | 238 |
| WP_048124368               | 160             | SVYGATKAF <del>LITAG</del> -GGLFMFAG <del>FMLR</del> VVTGT <del>YIGISEVAQ</del> SSELL <del>STLHG</del> SPLYVAVL <del>LVIFIGA</del> ASKSAQ <del>GPFI</del> WLP                                                                               | 238 |
| WP_023846288               | 160             | SVYGATKAF <del>LITAG</del> -GGLFMFAG <del>FMLR</del> VVTGT <del>YIGISEVAQ</del> SSELL <del>STLHG</del> SPLYVAVL <del>LVIFIGA</del> ASKSAQ <del>GPFI</del> WLP                                                                               | 238 |
| WP_013194388               | 160             | SIYGATKSL <del>LITAA</del> -GGLIMF <del>IGFL</del> ILHSIT <del>GTFDIPT</del> ILHDS <del>SMIENIK</del> NHDL <del>FLVTL</del> IFIFIGA <del>ASKSAQ</del> GPFI <del>WLP</del>                                                                   | 238 |
| WP_048204897               | 161             | SIYGATKSL <del>LITAA</del> -GGLAMLAG <del>FLLRSIT</del> GSF <del>DLAEL</del> SDP <del>QIIHA</del> IKHE <del>HELFLITL</del> ILIGAA <del>ASKSAQ</del> GPFI <del>WLP</del>                                                                     | 239 |
| WP_013037209               | 160             | SVYGATKSL <del>LITAG</del> -GGLFMLAG <del>FLLR</del> HAIT <del>GTFDIPT</del> ILHDS <del>SMIENIK</del> KAHP <del>FLITL</del> ILIGAA <del>ASKSAQ</del> GPFI <del>WLP</del>                                                                    | 238 |
| WP_015325011               | 160             | SVYGATKSL <del>LITAA</del> -GGLFMLAG <del>FIVL</del> RAIT <del>GTFDIPT</del> ILQNET <del>ITIMV</del> KGHE <del>LFLAAL</del> ILIFIGA <del>ASKSAQ</del> GPFI <del>WLP</del>                                                                   | 238 |
| WP_048147233               | 160             | SVYGATKSL <del>LITAS</del> -GGLFMLAG <del>FVLNI</del> IT <del>GTFDIAT</del> VLQNE <del>SMIETIK</del> GHE <del>FFLFAL</del> VLILIGAA <del>ASKSAQ</del> GPFI <del>WLP</del>                                                                   | 238 |
| WP_011498313               | 160             | SIYGATKSL <del>LITAS</del> -GGLAMLAG <del>FLLGNIT</del> GSF <del>ELAAI</del> LN <del>DPQVINA</del> IKHE <del>HELFLITL</del> ILIGAA <del>ASKSAQ</del> GPFI <del>WLP</del>                                                                    | 238 |
| WP_013898326               | 160             | SVYGAKKSL <del>ILSAG</del> CGGLVM <del>FVGL</del> LRL <del>RSITGT</del> FDIPT <del>ISDP</del> SMISTIQ <del>GHEL</del> FVIT <del>LVFIFIGA</del> ASKSAQ <del>GPFI</del> WLP                                                                   | 239 |
| WP_011024445               | 239             | NAMEAPT <del>PVS</del> AF <del>LHS</del> AT <del>MVK</del> AGV <del>YL</del> VARM <del>HPI</del> LSG <del>TE</del> PW <del>LILV</del> SGT <del>GMITM</del> V <del>MAG</del> MAFR <del>QTDI</del> KA <del>IL</del> AYST <del>ISQL</del> AYLM | 318 |
| WP_048174247               | 239             | NAMEAPT <del>PVS</del> AF <del>LHS</del> AT <del>MVK</del> AGV <del>YL</del> VARM <del>HPI</del> LSG <del>TE</del> PW <del>LILV</del> SGT <del>GMITM</del> V <del>MAG</del> MAFR <del>QTDI</del> KA <del>IL</del> AYST <del>ISQL</del> AYLM | 318 |
| WP_048136646               | 239             | NAMEAPT <del>PVS</del> AF <del>LHS</del> AT <del>MVK</del> AGV <del>YL</del> VARM <del>HPI</del> LSG <del>TE</del> PW <del>LILV</del> SGT <del>GMITM</del> V <del>MAG</del> MAFR <del>QTDI</del> KA <del>IL</del> AYST <del>ISQL</del> AYLM | 318 |
| WP_048125080               | 239             | NAMEAPT <del>PVS</del> AF <del>LHS</del> AT <del>MVK</del> AGV <del>YL</del> VARM <del>HPI</del> LSG <del>TE</del> PW <del>LILV</del> SGT <del>GMITM</del> V <del>MAG</del> MAFR <del>QTDI</del> KA <del>IL</del> AYST <del>ISQL</del> AYLM | 318 |
| WP_048124368               | 239             | NAMEAPT <del>PVS</del> AF <del>LHS</del> AT <del>MVK</del> AGV <del>YL</del> VARM <del>HPI</del> LSG <del>TE</del> PW <del>LILV</del> SGT <del>GMITM</del> V <del>MAG</del> MAFR <del>QTDI</del> KA <del>IL</del> AYST <del>ISQL</del> AYLM | 318 |
| WP_023846288               | 239             | NAMEAPT <del>PVS</del> AF <del>LHS</del> AT <del>MVK</del> AGV <del>YL</del> VARM <del>HPI</del> LSG <del>TE</del> PW <del>LILV</del> SGT <del>GMITM</del> V <del>MAG</del> MAFR <del>QTDI</del> KA <del>IL</del> AYST <del>ISQL</del> AYLM | 318 |
| WP_013194388               | 239             | NAMEAPT <del>PVS</del> AF <del>LHS</del> AT <del>MVK</del> AGV <del>YL</del> VARM <del>HPI</del> LSG <del>TE</del> PW <del>LILV</del> SGT <del>GMITM</del> V <del>MAG</del> MAFR <del>QTDI</del> KA <del>IL</del> AYST <del>ISQL</del> AYLM | 318 |
| WP_048204897               | 240             | NAMEAPT <del>PVS</del> AF <del>LHS</del> AT <del>MVK</del> AGV <del>YL</del> VARM <del>HPI</del> LSG <del>TE</del> PW <del>LILV</del> SGT <del>GMITM</del> V <del>MAG</del> MAFR <del>QTDI</del> KA <del>IL</del> AYST <del>ISQL</del> AYLM | 318 |
| WP_013037209               | 239             | NAMEAPT <del>PVS</del> AF <del>LHS</del> AT <del>MVK</del> AGV <del>YL</del> VARM <del>HPI</del> LSG <del>TE</del> PW <del>LILV</del> SGT <del>GMITM</del> V <del>MAG</del> MAFR <del>QTDI</del> KA <del>IL</del> AYST <del>ISQL</del> AYLM | 318 |
| WP_015325011               | 239             | NAMEAPT <del>PVS</del> AF <del>LHS</del> AT <del>MVK</del> AGV <del>YL</del> VARM <del>HPI</del> LSG <del>TE</del> PW <del>LILV</del> SGT <del>GMITM</del> V <del>MAG</del> MAFR <del>QTDI</del> KA <del>IL</del> AYST <del>ISQL</del> AYLM | 318 |
| WP_048147233               | 239             | NAMEAPT <del>PVS</del> AF <del>LHS</del> AT <del>MVK</del> AGV <del>YL</del> VARM <del>HPI</del> LSG <del>TE</del> PW <del>LILV</del> SGT <del>GMITM</del> V <del>MAG</del> MAFR <del>QTDI</del> KA <del>IL</del> AYST <del>ISQL</del> AYLM | 318 |
| WP_011498313               | 239             | NAMEAPT <del>PVS</del> AF <del>LHS</del> AT <del>MVK</del> AGV <del>YL</del> VARM <del>HPI</del> LSG <del>TE</del> PW <del>LILV</del> SGT <del>GMITM</del> V <del>MAG</del> MAFR <del>QTDI</del> KA <del>IL</del> AYST <del>ISQL</del> AYLM | 318 |
| WP_013898326               | 240             | NAMEAPT <del>PVS</del> AF <del>LHS</del> AT <del>MVK</del> AGV <del>YL</del> VARM <del>HPI</del> LSG <del>TE</del> PW <del>LILV</del> SGT <del>GMITM</del> V <del>MAG</del> MAFR <del>QTDI</del> KA <del>IL</del> AYST <del>ISQL</del> AYLM | 319 |
| WP_011024445               | 319             | TMYGYSTAEHPGLG <del>F</del> AAAT <del>FHLL</del> NHST <del>FKATL</del> FLVAG <del>IVA</del> HEAT <del>TRDIRK</del> LGL <del>LRK</del> EMPK <del>TFIVAV</del> IAAAS <del>MAGV</del> PPLNG                                                    | 398 |
| WP_048174247               | 319             | TMYGYSTAEHPGLG <del>F</del> AAAT <del>FHLL</del> NHST <del>FKATL</del> FLVAG <del>IVA</del> HEAT <del>TRDIRK</del> LGL <del>LRK</del> EMPK <del>TFIVAV</del> IAAAS <del>MAGV</del> PPLNG                                                    | 398 |
| WP_048136646               | 319             | TMYGYSTAEHPGLG <del>F</del> AAAT <del>FHLL</del> NHST <del>FKATL</del> FLVAG <del>IVA</del> HEAT <del>TRDIRK</del> LGL <del>LRK</del> EMPK <del>TFIVAV</del> IAAAS <del>MAGV</del> PPLNG                                                    | 398 |
| WP_048125080               | 319             | TMYGYSTAEHPGLG <del>F</del> AAAT <del>FHLL</del> NHST <del>FKATL</del> FLVAG <del>IVA</del> HEAT <del>TRDIRK</del> LGL <del>LRK</del> EMPK <del>TFIVAV</del> IAAAS <del>MAGV</del> PPLNG                                                    | 398 |
| WP_048124368               | 319             | TMYGYSTAEHPGLG <del>F</del> AAAT <del>FHLL</del> NHST <del>FKATL</del> FLVAG <del>IVA</del> HEAT <del>TRDIRK</del> LGL <del>LRK</del> EMPK <del>TFIVAV</del> IAAAS <del>MAGV</del> PPLNG                                                    | 398 |
| WP_023846288               | 319             | TMYGYSTAEHPGLG <del>F</del> AAAT <del>FHLL</del> NHST <del>FKATL</del> FLVAG <del>IVA</del> HEAT <del>TRDIRK</del> LGL <del>LRK</del> EMPK <del>TFIVAV</del> IAAAS <del>MAGV</del> PPLNG                                                    | 398 |
| WP_013194388               | 319             | TMYGYSTAEHPGLG <del>F</del> AAAT <del>FHLL</del> NHST <del>FKATL</del> FLVAG <del>IVA</del> HEAT <del>TRDIRK</del> LGL <del>LRK</del> EMPK <del>TFIVAV</del> IAAAS <del>MAGV</del> PPLNG                                                    | 398 |
| WP_048204897               | 320             | TMYGYSTAEHPGLG <del>F</del> AAAT <del>FHLL</del> NHST <del>FKATL</del> FLVAG <del>IVA</del> HEAT <del>TRDIRK</del> LGL <del>LRK</del> EMPK <del>TFIVAV</del> IAAAS <del>MAGV</del> PPLNG                                                    | 399 |
| WP_013037209               | 319             | TMYGYSTAEHPGLG <del>F</del> AAAT <del>FHLL</del> NHST <del>FKATL</del> FLVAG <del>IVA</del> HEAT <del>TRDIRK</del> LGL <del>LRK</del> EMPK <del>TFIVAV</del> IAAAS <del>MAGV</del> PPLNG                                                    | 398 |
| WP_015325011               | 319             | TMYGYSTAEHPGLG <del>F</del> AAAT <del>FHLL</del> NHST <del>FKATL</del> FLVAG <del>IVA</del> HEAT <del>TRDIRK</del> LGL <del>LRK</del> EMPK <del>TFIVAV</del> IAAAS <del>MAGV</del> PPLNG                                                    | 398 |
| WP_048147233               | 319             | TMYGYSTAEHPGLG <del>F</del> AAAT <del>FHLL</del> NHST <del>FKATL</del> FLVAG <del>IVA</del> HEAT <del>TRDIRK</del> LGL <del>LRK</del> EMPK <del>TFIVAV</del> IAAAS <del>MAGV</del> PPLNG                                                    | 398 |
| WP_011498313               | 319             | TMYGYSTAEHPGLG <del>F</del> AAAT <del>FHLL</del> NHST <del>FKATL</del> FLVAG <del>IVA</del> HEAT <del>TRDIRK</del> LGL <del>LRK</del> EMPK <del>TFIVAV</del> IAAAS <del>MAGV</del> PPLNG                                                    | 398 |
| WP_013898326               | 320             | TMYGYSTAEHPGLG <del>F</del> AAAT <del>FHLL</del> NHST <del>FKATL</del> FLVAG <del>IVA</del> HEAT <del>TRDIRK</del> LGL <del>LRK</del> EMPK <del>TFIVAV</del> IAAAS <del>MAGV</del> PPLNG                                                    | 399 |
| WP_011024445               | 399             | FLSKEMFYETSLEIGELV <del>SE</del> TYGG <del>PWAI</del> IFPAVAVAG <del>VFTLM</del> YSIK <del>LIDGIF</del> LGER <del>THDHDV</del> PHV <del>HEAP</del> VWMLAPAVF                                                                                | 478 |
| WP_048174247               | 399             | FLSKEMFYETSLEIGELV <del>SE</del> TYGG <del>PWAI</del> IFPAVAVAG <del>VFTLM</del> YSIK <del>LIDGIF</del> LGER <del>THDHDV</del> PHV <del>HEAP</del> VWMLAPAVF                                                                                | 478 |

|              |     |                                                                                       |     |
|--------------|-----|---------------------------------------------------------------------------------------|-----|
| WP_048136646 | 399 | FLSKEMFYETSLEIGELVSEYGGPWAIVFPVAVAGGVFTLMYSIKLVDGIFLGHRTDHDVPHHVHDAPVWMLAPAVF         | 478 |
| WP_048125080 | 399 | FLSKEMFYETSLEIGELVSEYGGPWAIVFPVAVAGGVFTLMYSIRLDIDIFLGERTHDHDVPHHVHEAPVWMLAPAVF        | 478 |
| WP_048124368 | 399 | FLSKEMFYETSLEIGKLVSEYGGPWAIVFPVAVAGGVFTLMYSIKLIDGIFLGERTHDHDVPHHVHDAPVWMLGPAVF        | 478 |
| WP_023846288 | 399 | FLSKEMFYEASVEMGHLL----GGPYTVLIPALAVLGGVFTFAYSIKLIDGIFLGKRPAKG-LPEHIHDPMSIMLAPAI       | 473 |
| WP_013194388 | 399 | FLSKEMFYKSSVEMGAAL----GPFPSIIVPAIAVVGVLTFAYSIKLIDGIFLGKRKDEF-LPHHIHEAPYVMLIPAGL       | 473 |
| WP_048204897 | 400 | FLSKEMFYESSLEMGHML----GGAFTFIIPACAVLGGVFTFAYSIKLIDGIFLGERKDEF-LPEHIHEPPLTMLIPPAF      | 474 |
| WP_013037209 | 399 | FLSKEMFYETSVMGHI I---GGPFTFLIPAAAVLGGVFTFAYSIKLIDGIFLGEKHHDH-LPEHIHEPPYTMLVPAAF       | 473 |
| WP_015325011 | 399 | FLSKEMFYESSIEMGHAL----GSPFTFIIPAAVAGGVFTFAYSIKFIAAIFLGKRPEKG-IPPHIHDPMLIMLPAAF        | 473 |
| WP_048147233 | 399 | FLSKEMFYESSLEMGHLL----GGPLEYLIPAAAVLGGVFTFAYSIRFIDGIFLGKRRESEH-LPKHMHEPMLIMLVPAA      | 473 |
| WP_011498313 | 399 | FLSKEMFYESSIEMGAS I---GGIFTFLIPAAVAVLGGVFTFAYSIKLIDGIFLGERDKNA-IPHHIHEPPMTMLIPPAF     | 473 |
| WP_013898326 | 400 | FLSKEMFYESSVVMGNTL----GTPYTFIIPAAVAVLGGVFTFAYSIKIIDGIFLGKRQDDH-LPKKIHDPSAVMLVPTAA     | 474 |
| WP_011024445 | 479 | LVGLIIFFGLYPTFPISVLIQPAYSGLVPHADHLHVALWHGVTTPLLMTIATFAIGLVLYKFYDAIAAWQNSFNDKLPWI      | 558 |
| WP_048174247 | 479 | LVGLIIFFGLYPKFPIISVLIQPAYSGLVPHADHLHVALWHGVTTPLLMTIATFAIGLVLYKFYDSIAAWQNSFNDKLPVW     | 558 |
| WP_048136646 | 479 | LVGLIIFFGLYPKFPIEVLWIWPAYSGLVPHADHLHVALWHGVTTPLLMTIATFAIGLVLYKFYDSIAAWQNSFNAKLPWI     | 558 |
| WP_048125080 | 479 | LVGLIIFFGLYPKFPIETLIQPAYSGLVPHADHLHVALWHGVTTPLLMTIATFAIGLVLYKFYDSIAAWQNSFNDKLPWI      | 558 |
| WP_048124368 | 479 | LVGLIIFFGLYPKFPIETLVQPAYSGLVPHADHLHVALWHGVTTPLLMTIATFAIGLVLYKFYDSLAAWQNSFNDKLPVW      | 558 |
| WP_023846288 | 474 | LAGLILFGLVPSIPVHNFIIEPTVSGITLLEEAHLHVKLWHGFTTSLMMTIATFLLGILYTYQYDRIAEWQNRFNARFPVW     | 553 |
| WP_013194388 | 474 | LSVLVILFGLVPSIPVHNFIIEPATSGIILETAHLHVTHWHGFTPAFMMTIITFVLGLLIYTKYESLASWQDRNLNASYPWI    | 553 |
| WP_048204897 | 475 | LAGLVILFGLVPSIPVHNFIIEPTVSGIILETAHLHVKLWHGFTTSLMMTIATFLLGILYTYQYDRIAEWQNSFNAKFPWI     | 554 |
| WP_013037209 | 474 | LAGLVILFGLVPSIPVHNFIIEPTTAGIVLEEVHLHVKLWHGFTPALFMTIITFVLAGLAIYTRYDNIAAWQDRFNARYPVW    | 553 |
| WP_015325011 | 474 | LAGLIIIFGLVPSIAVQNLIEPAASSIMMEAQHLHVQLWHGLTGLSLAMTVVTFLLGIAVYTKYDRIAEWQNSFNKRYPMI     | 553 |
| WP_048147233 | 474 | LAILVILIGLFPSSAVQYIIEPAASGILLQEVHLHVSLWHGFTAALMMTIITFVLAGLAIYTKYDAIAAWQDRMNRARYPWF    | 553 |
| WP_011498313 | 474 | LAFVLVILFGLVPSIPVHNFIIEPAASGILLQEVHLHVSLWHGFTAALMMTIITFVLAGLAIYTKYDAIAAWQDRMNRARYPWF  | 553 |
| WP_013898326 | 475 | LAFVLVILFGLVPSIPVNLIIIEPAVAGIILETVSLNVKLWHGLTPELFTMTIITFVLAGLAIYTKYDDIARWQDRFNVRHPR I | 554 |
| WP_011024445 | 559 | SVNYWYDATVNNAKGITHKFAAFAQPGPIGVYVKMTLLFMI FLIFWPVYKFGINLIGVGDLLPAGIYDAQPYEIVLYS       | 638 |
| WP_048174247 | 559 | SVNYWYDATVNNAKGIAHKFSFAQPGPIGVYVKMTLLFMI FLIFWPVYKFGIGLIGIGDILPAGIYDAQPYEIVLYS        | 638 |
| WP_048136646 | 559 | SVNYWYDAIVNNAKPIAHKFAAITQPGPIGVYVKMTLLFMI FLIFWPVYKFSIGLIGVGDLLPAGINYAQPVEIVLYS       | 638 |
| WP_048125080 | 559 | STNYWYDATVNNARDITHKFAAITQPGPIGVYIKMTLLFMGFLIFWPVYKFGIGMIGIGNILPAGINYAAQPYEIVLYA       | 638 |
| WP_048124368 | 559 | SMNYWYDATVNNARDVTHKFAAITQPGPIGVYIKMTLLFMI FLIFWPVYKFSVGMGIGIGNILPAGINYAAQPYEIALYS     | 638 |
| WP_023846288 | 554 | SVNYYYDGAVNNAKSVTSKFSNRMQPGPIKTYVLLALLLTLAMFAIPAILLAT-----SLVQNLNFDVPLYEALIFL         | 626 |
| WP_013194388 | 554 | SVNYYYDAIVNNARTNAKYVSSVFPQPGVVKTYINALLILTIALIMIPILVLSG-----DLIPQTLNFDVNPYEALLML       | 626 |
| WP_048204897 | 555 | SVNYYYDNAVDSAKDRAFKFSSFTQPGNPKNYINAMLLMIALVAVPVIILAT-----NIIPSTLNFDIPPEYEAILL         | 627 |
| WP_013037209 | 554 | SVNYYYDRIVDGAKGSAGKFAQPGPKIKLYIYAILVLMVILFTIPLFMMTT-----QVFSVNLNFDIPPEYEVIMI          | 626 |
| WP_015325011 | 554 | SVNYYYDSLNNAGDTLKGSSFMQPGPKIKLYVLLALLLTLAMFAIPAILLAT-----GFAP-TLNLNLEPEYELVVF         | 625 |
| WP_048147233 | 554 | SINYAYDRIVNGAQKSSAFAAVMQPGPKPYLVALLLFLVLGAI PAMLVAT-----TLVPADLNFNVPPEYEGILLG         | 626 |
| WP_011498313 | 554 | SINYYYDRAVDSAKGNARFRSSRQGTGNIKLYMSAMLLMIALIAIPAILLAT-----NIMPQLNFDIPPEYEAILL          | 626 |
| WP_013898326 | 555 | SINYYYDKIVGNATYNAGLFSSKFIQPGPKIKLYMIPILLLAILSILIPITLLSL-----EMLPVTLNFEIPPEYELIVFL     | 627 |
| WP_011024445 | 639 | LMILAAALGAALLPRYLPAVISLSSELGFLVALLVYVLKAPDLAMTQVCVETLSTIIFILVLIKIPQKFKEPMPAGKVLVNL    | 718 |
| WP_048174247 | 639 | LMILAAALGAALLPRYLPAVISLSSELGFLVALLVYVLKAPDLAMTQVCVETLSTIIFILVVMKVQKFKEPMPAGKVLVNL     | 718 |
| WP_048136646 | 639 | LMILAAALGAALLPRYLPAVISLSSELGFLVSLLYIYLKAPDLAMTQVCVETLSTIIFILVLMKIPQKFKEPMPAGKVMVNL    | 718 |
| WP_048125080 | 639 | LMILAAALGAAVLPKYLPAVISLSSELGFLVALLVYVLKAPDLAMTQVCVETLSTIIFILVVMKVQKFKEPMPAGKVLVNL     | 718 |
| WP_048124368 | 639 | LMLLAAALGAALLPKYLPAVISLSSELGFLVSLLYIYLKAPDLAMTQVCVETLSTIIFILVLMKIPQKFKEPMPAGKVMVNL    | 718 |
| WP_023846288 | 627 | FMIVAAALGAALLPRYIPAIISLSGLGYLVALLFIYQLAPDLALQVLVETLSTIIFLLAIVKIPQKFKEHIPSSTTLARDL     | 706 |
| WP_013194388 | 627 | LMVVAIAAATVLPKYIPAIISLSGLGYVSLLFYIYLKAPDLALTQILVETLTTIIFLLVIVRIPQTFREKLSKANLTRDV      | 706 |
| WP_048204897 | 628 | LLVVAALAAAVLPKYLPAIISLSALGYVSLLFYIYLKAPDLALTQVLVETLSTIIFLLAIVKIPQKFKEHIPSSTTLARDL     | 707 |
| WP_013037209 | 627 | LMVVAIAAATLHRYLSAVIAISAVGYLVSLMFIYIYLKAPDLALTQFLVETLATIIFLLVIARVQTFKEKIPKNILLRDI      | 706 |
| WP_015325011 | 626 | FMIMAAVGAAVLPKYLPAVISLSALGYLVSLLFYIYLSAPDLALQVLVETLSTIIFLFAIVKIPQTFKEHIPSPLFMRDA      | 705 |
| WP_048147233 | 627 | LIVLAAALGTAIRKYLHAILAVSAGYLVSLVFIYQLAPDLAMTQILVETLTTIIFLLVILKIPQTFRENLTRSVLARDL       | 706 |
| WP_011498313 | 627 | LLIVAAALSAAILPTYLPSIISALSALGYVSLLFYIYLKAPDLALTQILVETLSTIIFLLAIVKIPQKFKEHIPSISVFTRDI   | 706 |
| WP_013898326 | 628 | LIIITALLAAILPSYLPVAVIASAMGFLVGVIFIFFLAPDLALTQILVETLTTIIFVLIIVAKVQTFKEHIPRGTLRDI       | 707 |
| WP_011024445 | 719 | LISGVVSFGVLAVMLNANIGVLAPFETFNYYFIEKALAMTGGNLVNVNIVVDFRQYDTIGEISVLSLAAALGVYSLILSRA     | 798 |
| WP_048174247 | 719 | LISGVVSFGVLAVMLNANIGVLAPFETFNYYFMEKALAMTGGNLVNVNIVVDFRQYDTIGEISVLSLAAALGVYSLILSRA     | 798 |
| WP_048136646 | 719 | LISGVVSFGVLAVMLNANMGLVAPFETFNYYFMEKALAMTGGNLVNVNIVVDFRQYDTIGEISVLSLAAALGVYSLILSRA     | 798 |
| WP_048125080 | 719 | LLSGVVSFGVLAVMLNANIGVLAPFETFNYYFIEKALEMTGGNLVNVNIVVDFRQYDTIGEISVLSLAAALGVYSLILSRA     | 798 |
| WP_048124368 | 719 | LISGVVSFGLLAVMLNANIGVLAPFQFQTCYFFIQKSEMTGGNLVNVNIVVDFRQYDTLGEISVLSLAAALGVYSLIMSRG     | 798 |
| WP_023846288 | 707 | VISVAVSAMIFIMLINATQGIIVPPFESLSHYFIEKSLTLAGGHNIVNVIIVDFRQYDTLGEISVLCALAGVYNIHISRG      | 786 |
| WP_013194388 | 707 | FIISGLVSVGVFIVLINATQGIIVPPFESLSHYFIEKSVSLTGGHNIVNVIIVDFRQYDTLGEISVLCALAGVYNIHISRG     | 786 |
| WP_048204897 | 708 | TISLAVAASVAVVLLNATQGIIVPPFESLSHYFIENSLPLAGGHNIVNVIIVDFRQYDTLGEISVLCALAGVYNIHISRG      | 787 |
| WP_013037209 | 707 | MISLAVASTVLIILLNATQGIIVPPFESLSHYFLENSVPLAGGHNIVNVIIVDFRQYDTLGEISVLCALAGVYNIHISRG      | 786 |
| WP_015325011 | 706 | LIAVSVASVVFILLSATQGIIVPPFESLSHYFIEKALPLAGGHNIVNVIIVDFRQYDTLGEIVMCLAAALGVYNIHISRG      | 785 |
| WP_048147233 | 707 | LISAVGIVLVLLNATQGIIVPPFESLSHYFIEKALPLAGGHNIVNVIIVDFRQYDTLGEIVMCLAGVYNIHISRS           | 786 |
| WP_011498313 | 707 | LIAITVAASVAVVLLNATQGIIVDPFASLSHYFIDNSFLLAGGHNIVNVIIVDFRQYDTLGEISVLCALAGVYNIHISRS      | 786 |
| WP_013898326 | 708 | LISVTVASTVFIIMLYAAQGIIVPPFESVSHYFLEKSVLLTGGHNIVNVIIVDFRQYDTLGEIVMCLAAALGVYNIHISRG     | 787 |
| WP_011024445 | 799 | KKVKGKKE 806                                                                          |     |
| WP_048174247 | 799 | KKVKGKKE 806                                                                          |     |
| WP_048136646 | 799 | KKVKGKKE 806                                                                          |     |
| WP_048125080 | 799 | KKVKGKKE 806                                                                          |     |
| WP_048124368 | 799 | KKAKGKKE 806                                                                          |     |
| WP_023846288 | 787 | EDE----- 789                                                                          |     |
| WP_013194388 | 787 | ER----- 788                                                                           |     |
| WP_048204897 | 788 | EEQ----- 790                                                                          |     |
| WP_013037209 | 787 | EGE----- 789                                                                          |     |
| WP_015325011 | 786 | ESQ----- 788                                                                          |     |
| WP_048147233 | 787 | DSK----- 789                                                                          |     |

WP\_011498313 787 EE----- 788  
WP\_013898326 788 ERK----- 790

## REFERENCES

1. **Di Tommaso P, Moretti S, Xenarios I, Orobic M, Montanyola A, Chang JM, Taly JF, Notredame C.** Jul 2011. T-Coffee: a web server for the multiple sequence alignment of protein and RNA sequences using structural information and homology extension. Accessed Web Server issue.
